# Supplementary material for: Appraising the uptake and use of recommendations for a common outcome data set for clinical trials: a case study in fall injury prevention
Source: Springer Nature journal article supplement (doi:10.1186/s13063-016-1259-7), 2016-03-10
Supplement: MOESM2 [file 9783140]

**Additional file 2. Table S1. Level of adherence to recommendations within domains by trial**

| Author       | Year | Falls | Fall-related Injury | Psychological Consequences | Health-related quality of life | Physical activity | Domains reported |
|--------------|------|-------|---------------------|----------------------------|--------------------------------|-------------------|------------------|
| Freiberger   | 2007 | 85%   | x                   | x                          | x                              | x                 | 20%              |
| Luukinen     | 2007 | 54%   | 25%                 | x                          | x                              |                   | 60%              |
| Vaapio       | 2007 | x     | x                   | x                          | 50%                            | x                 | 20%              |
| Voukelatos   | 2007 | 69%   | x                   | x                          | x                              | x                 | 20%              |
| Elley        | 2008 | 77%   | 42%                 | 100%                       | 50%                            |                   | 100%             |
| Rapp         | 2008 | 62%   | x                   | x                          | x                              | x                 | 20%              |
| Shigematsu   | 2008 | 69%   | x                   | x                          | x                              | x                 | 20%              |
| Shigematsu   | 2008 | 69%   | x                   | 0%                         | x                              | x                 | 40%              |
| McMurdo      | 2009 | 46%   | x                   | x                          | 50%                            |                   | 60%              |
| Vind         | 2009 | 85%   | 42%                 | x                          | x                              | x                 | 40%              |
| Faes         | 2010 | 54%   | x                   | 0%                         | 50%                            | x                 | 60%              |
| Fitzharris   | 2010 | 62%   | 33%                 | x                          | x                              | x                 | 40%              |
| Kemmler      | 2010 | 54%   | 42%                 | x                          | x                              | x                 | 40%              |
| Logan        | 2010 | 85%   | 42%                 | 50%                        | x                              | x                 | 60%              |
| Smulders     | 2010 | 69%   | 42%                 | x                          | 50%                            |                   | 80%              |
| Goodwin      | 2011 | 46%   | x                   | 0%                         | 50%                            |                   | 80%              |
| Hill         | 2011 | 62%   | 33%                 | x                          | x                              | x                 | 40%              |
| Schepens     | 2011 | x     | x                   | x                          | x                              | x                 | 0%               |
| Spink        | 2011 | 85%   | x                   | 0%                         | 50%                            | x                 | 60%              |
| Trombetti    | 2011 | 77%   | x                   | x                          | x                              | x                 | 20%              |
| Von Stengel  | 2011 | 23%   | 17%                 | x                          | x                              | x                 | 40%              |
| Batchelor    | 2012 | 77%   | 42%                 | 50%                        | x                              |                   | 80%              |
| Perula       | 2012 | 31%   | 25%                 | x                          | x                              |                   | 60%              |
| Taylor       | 2012 | 77%   | x                   | x                          | x                              | x                 | 20%              |
| Tilson       | 2012 | 77%   | 42%                 | x                          | x                              | x                 | 40%              |
| Duque        | 2013 | 31%   | x                   | x                          | x                              | x                 | 20%              |
| Kovacs       | 2013 | 38%   | x                   | x                          | 0%                             | x                 | 40%              |
| Kovacs       | 2013 | 62%   | x                   | x                          | x                              | x                 | 20%              |
| Zieschang    | 2013 | 77%   | x                   | x                          | x                              |                   | 40%              |
| Ferrer       | 2014 | 69%   | 33%                 | x                          | x                              | x                 | 40%              |
| Moller       | 2014 | 54%   | 25%                 | x                          | x                              | x                 | 40%              |
| Palvanen     | 2014 | 46%   | 17%                 | x                          | x                              | x                 | 40%              |
| Perez-Roz    | 2014 | 31%   | 33%                 | x                          | x                              |                   | 40%              |
| Van Het Reve | 2014 | 31%   | x                   | 0%                         | x                              | x                 | 40%              |
